# Supplementary material for: A growth-rate composition formula for the growth of E. coli on co-utilized carbon substrates
Source: PubMed Central journal article supplement (PMC4422558; doi:10.15252/msb.20145537), 2015-04-10

group A

group B

succinate

pyruvate

glycerol

glucose

mannose

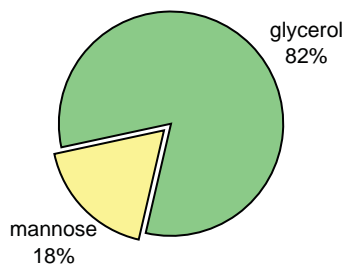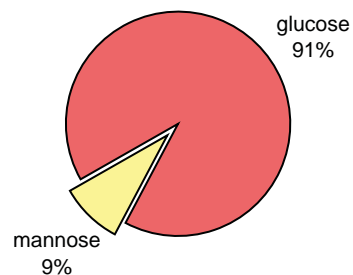

xylose

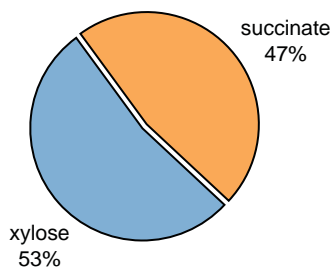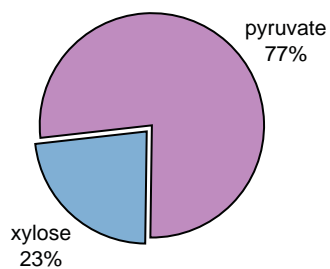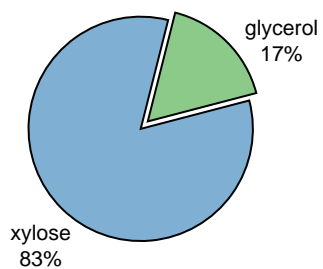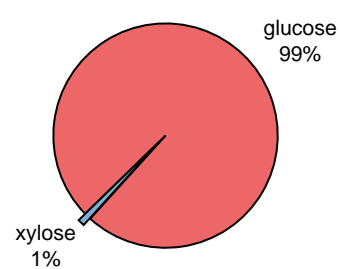

glycerol

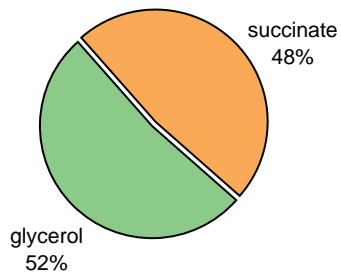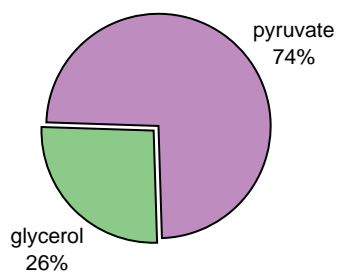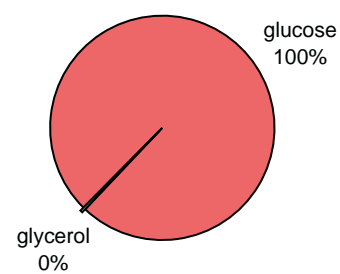

maltose

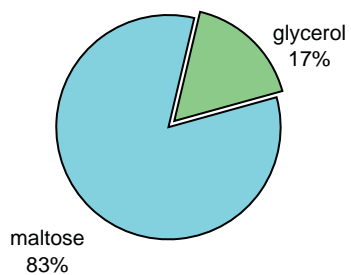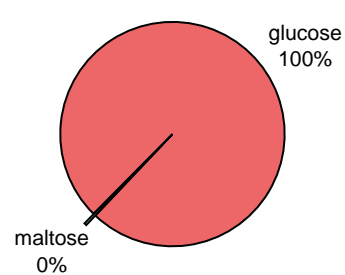

glucose

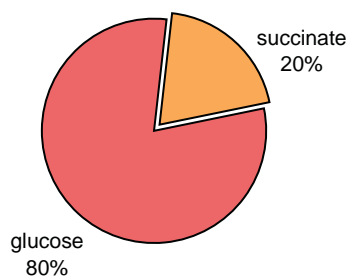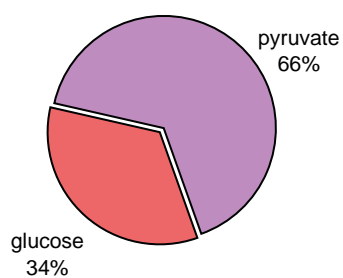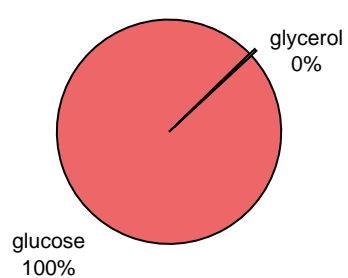

Supplement: msb0011-0801-sd2.pdf [file msb0011-0801-sd2.pdf]
