# Supplementary material for: A growth-rate composition formula for the growth of E. coli on co-utilized carbon substrates
Source: PubMed Central journal article supplement (PMC4422558; doi:10.15252/msb.20145537), 2015-04-10

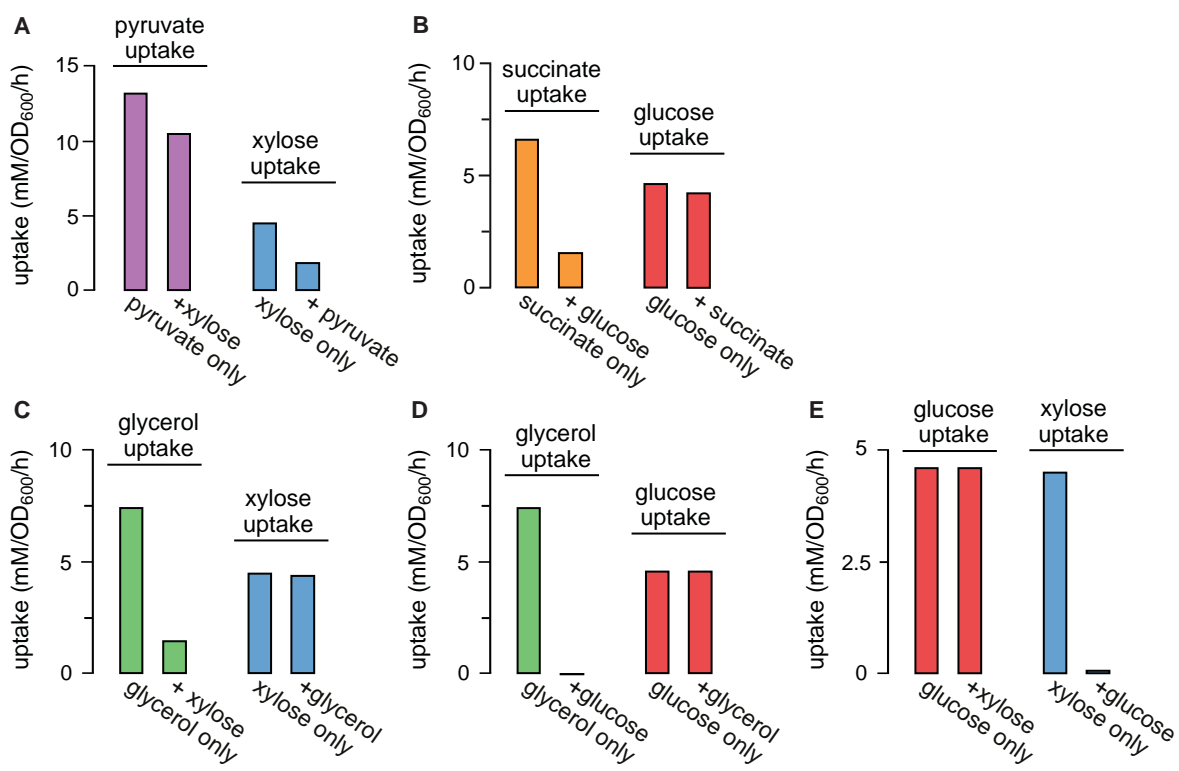

Supplement: msb0011-0801-sd3.pdf [file msb0011-0801-sd3.pdf]
